# Supplementary material for: Complete Chloroplast Genomes of Vachellia nilotica and Senegalia senegal: Comparative Genomics and Phylogenomic Placement in a New Generic System
Source: PubMed Central journal article supplement (PMC6876885; doi:10.1371/journal.pone.0225469), 2019-11-25

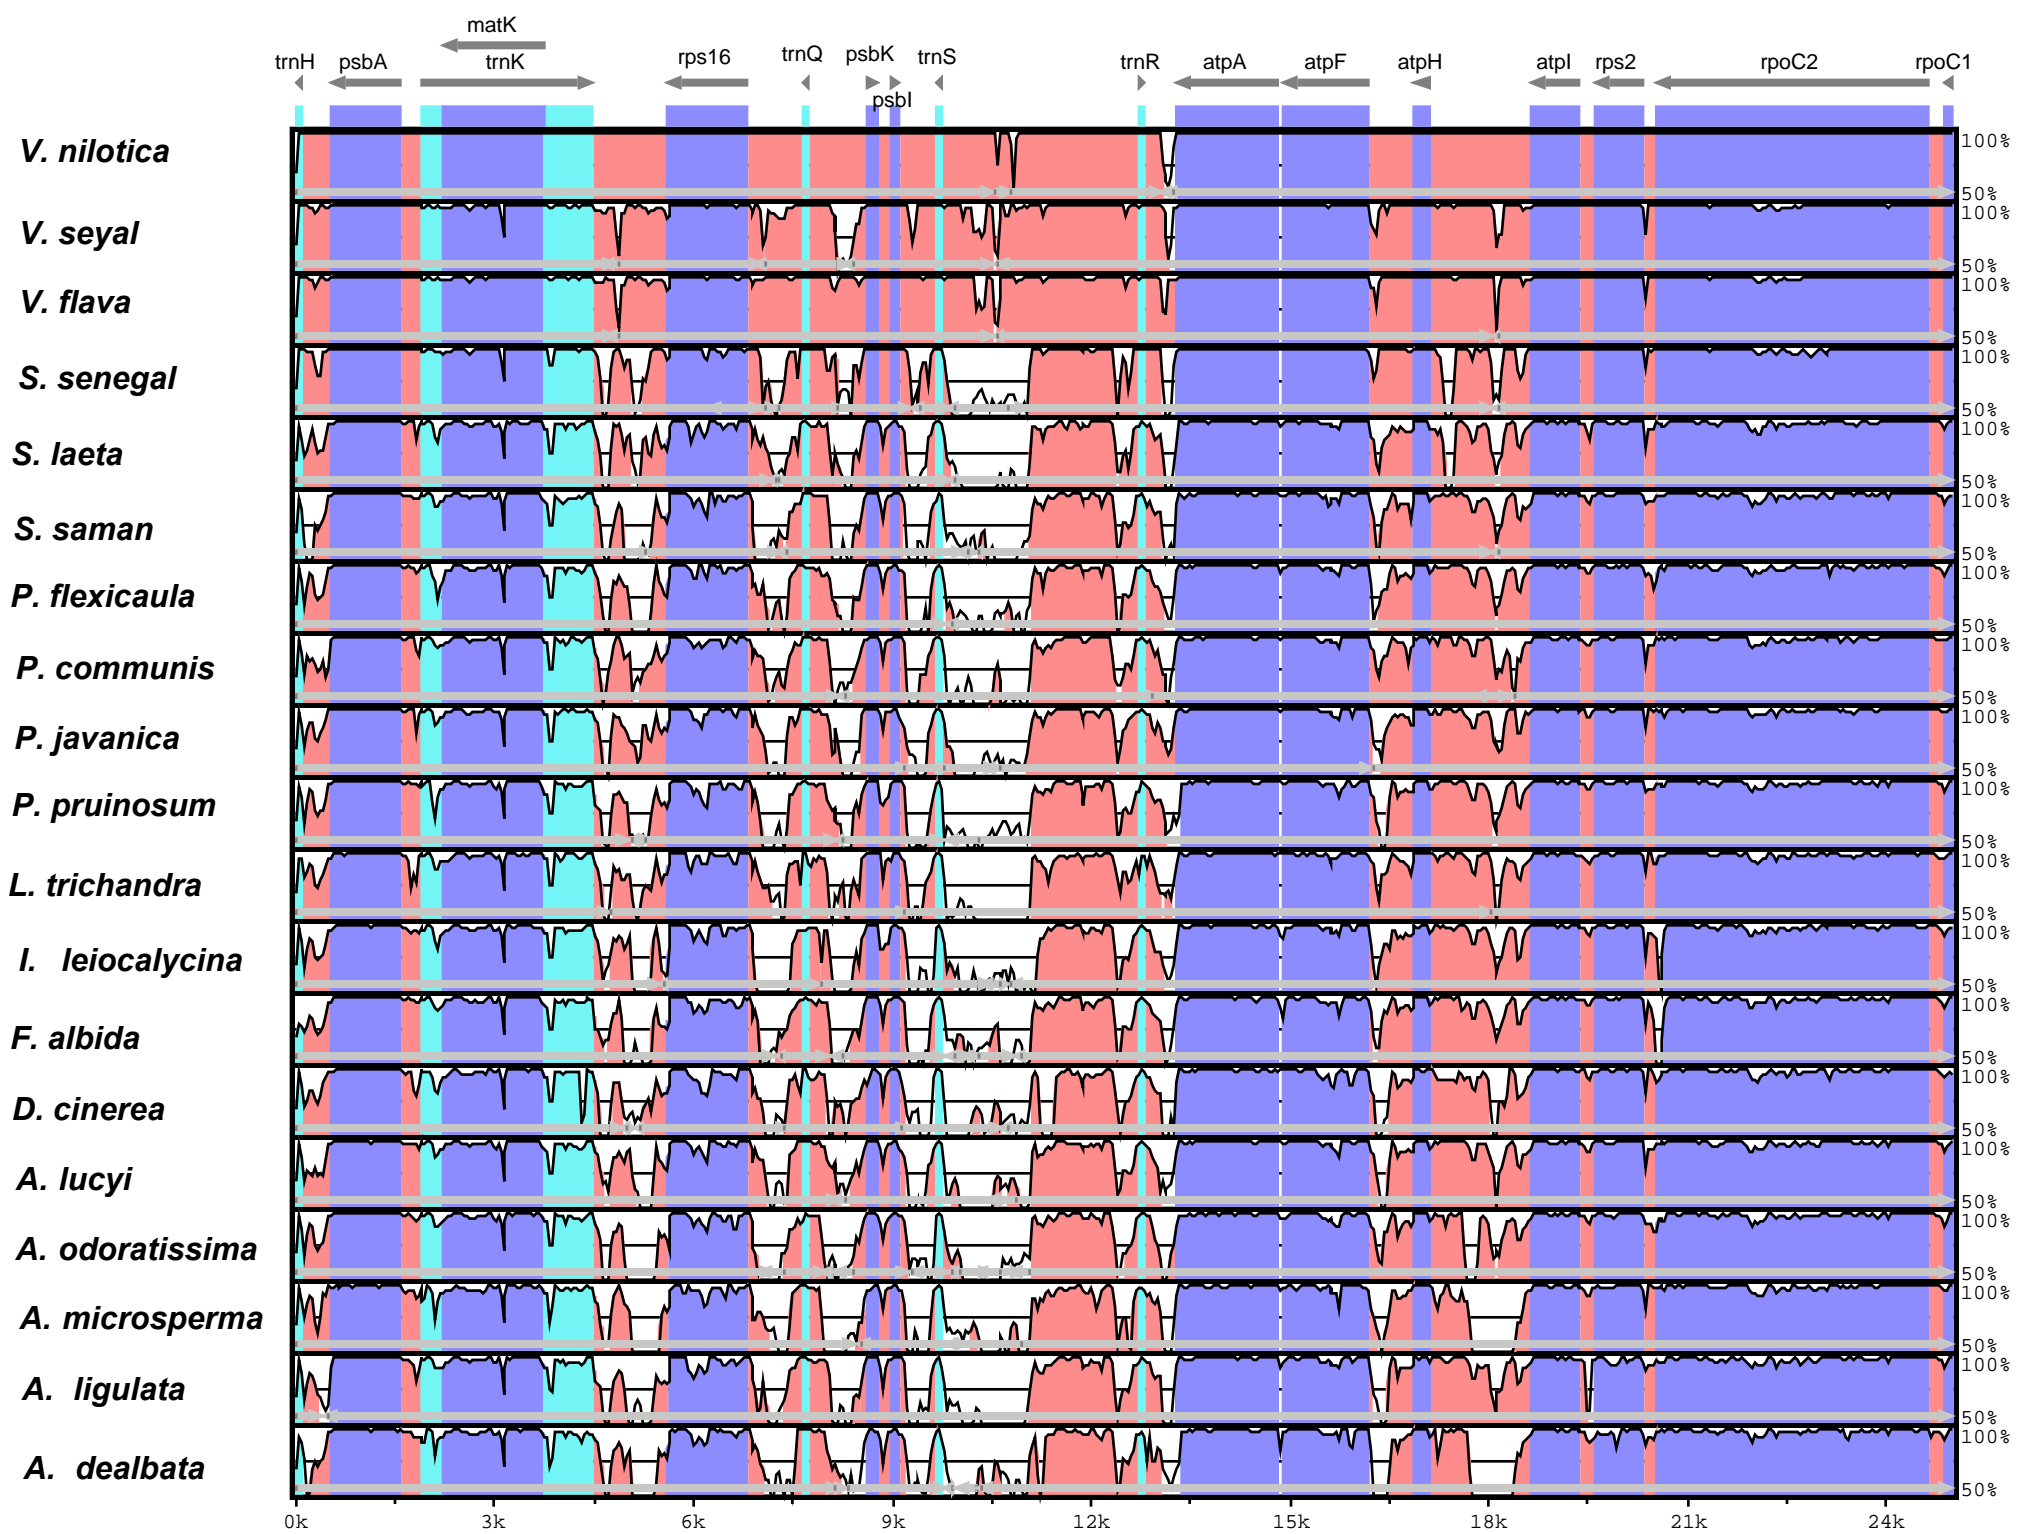

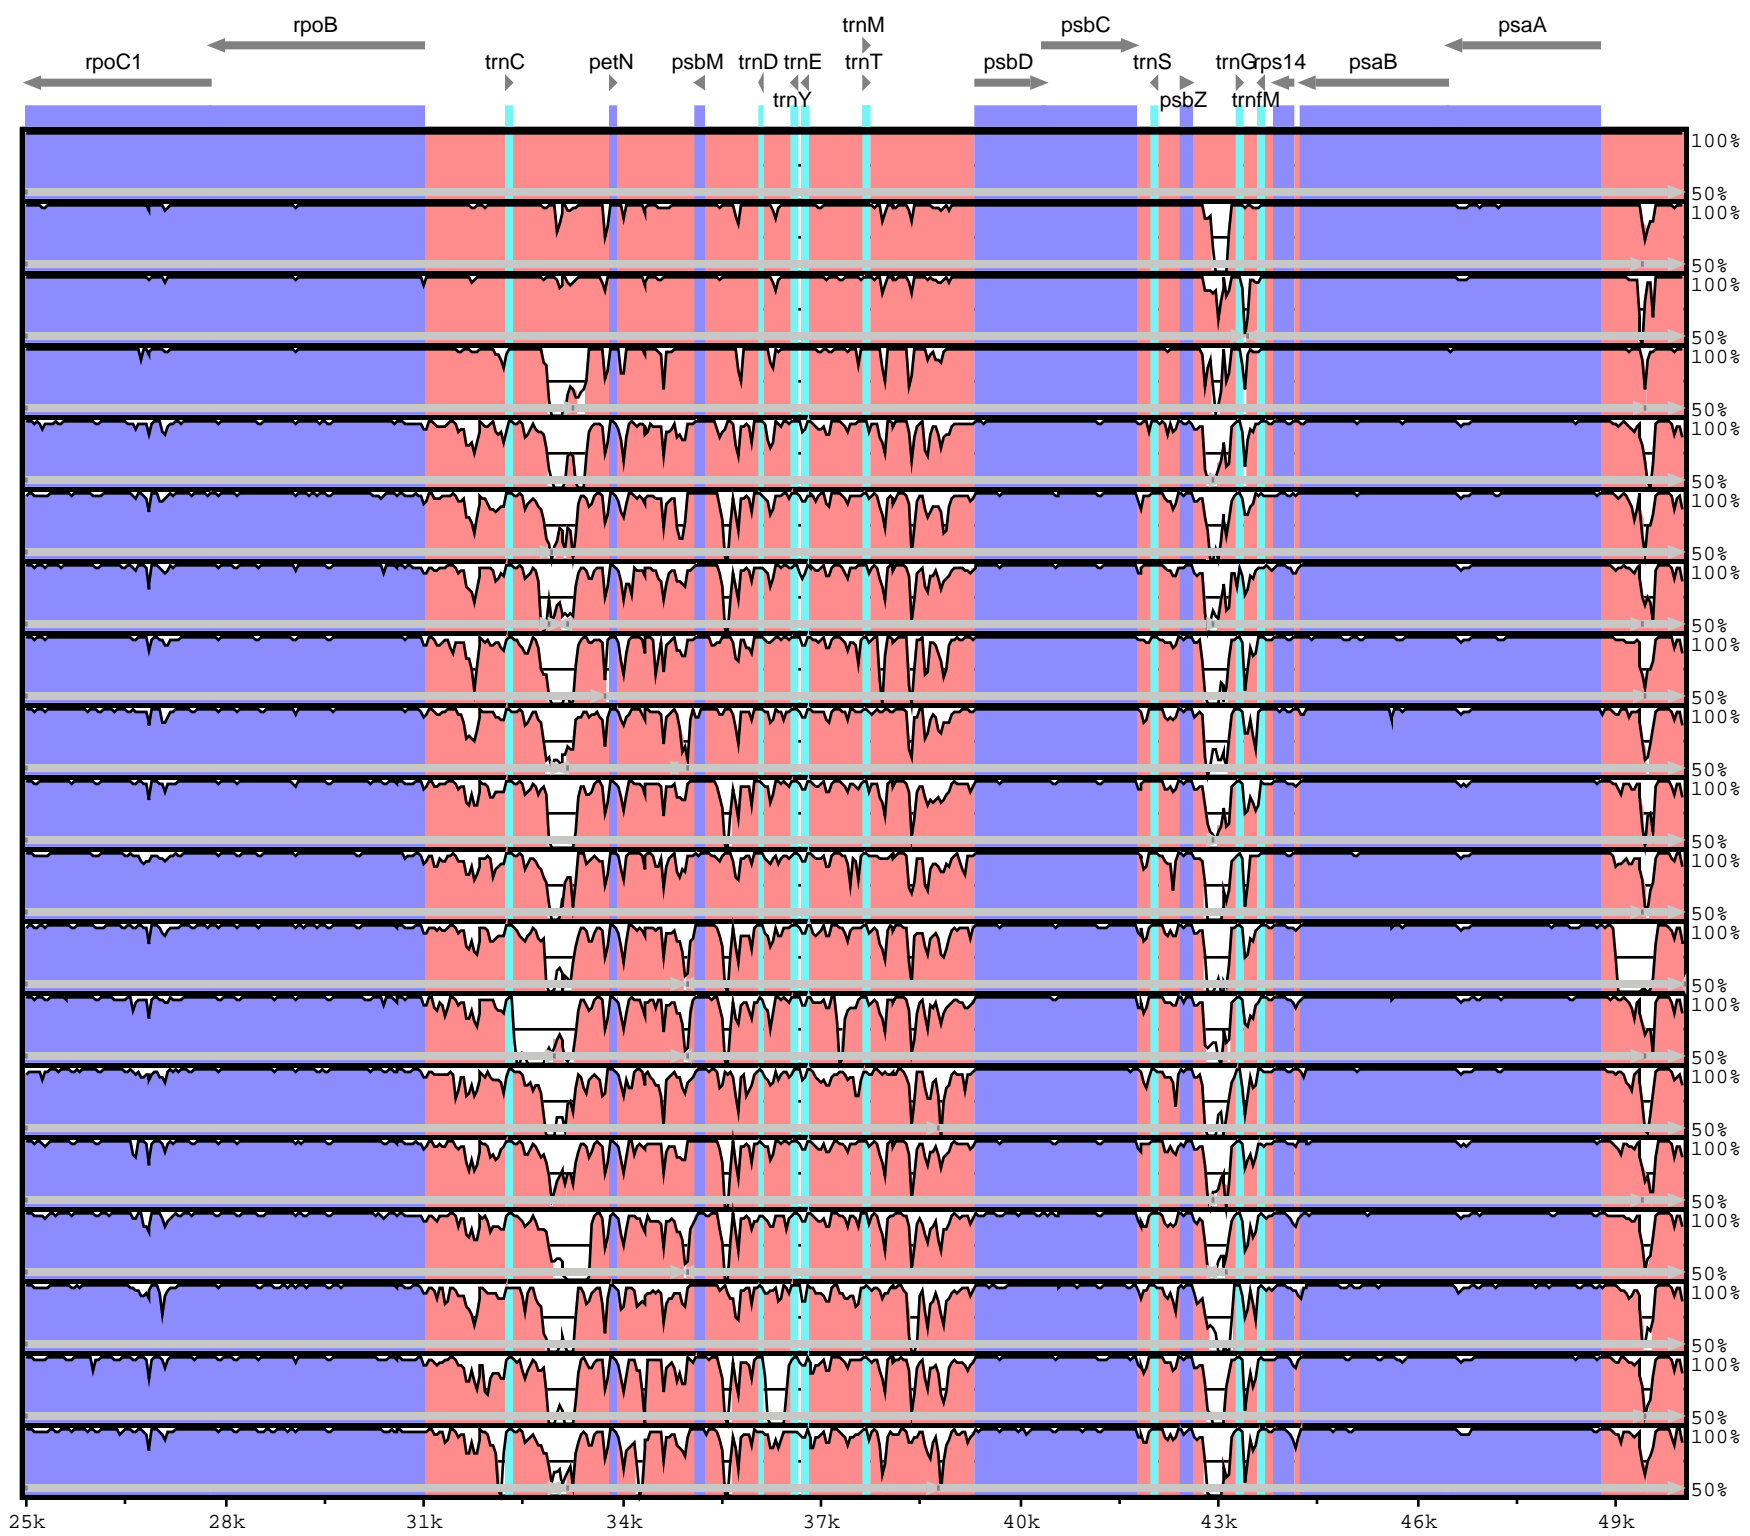

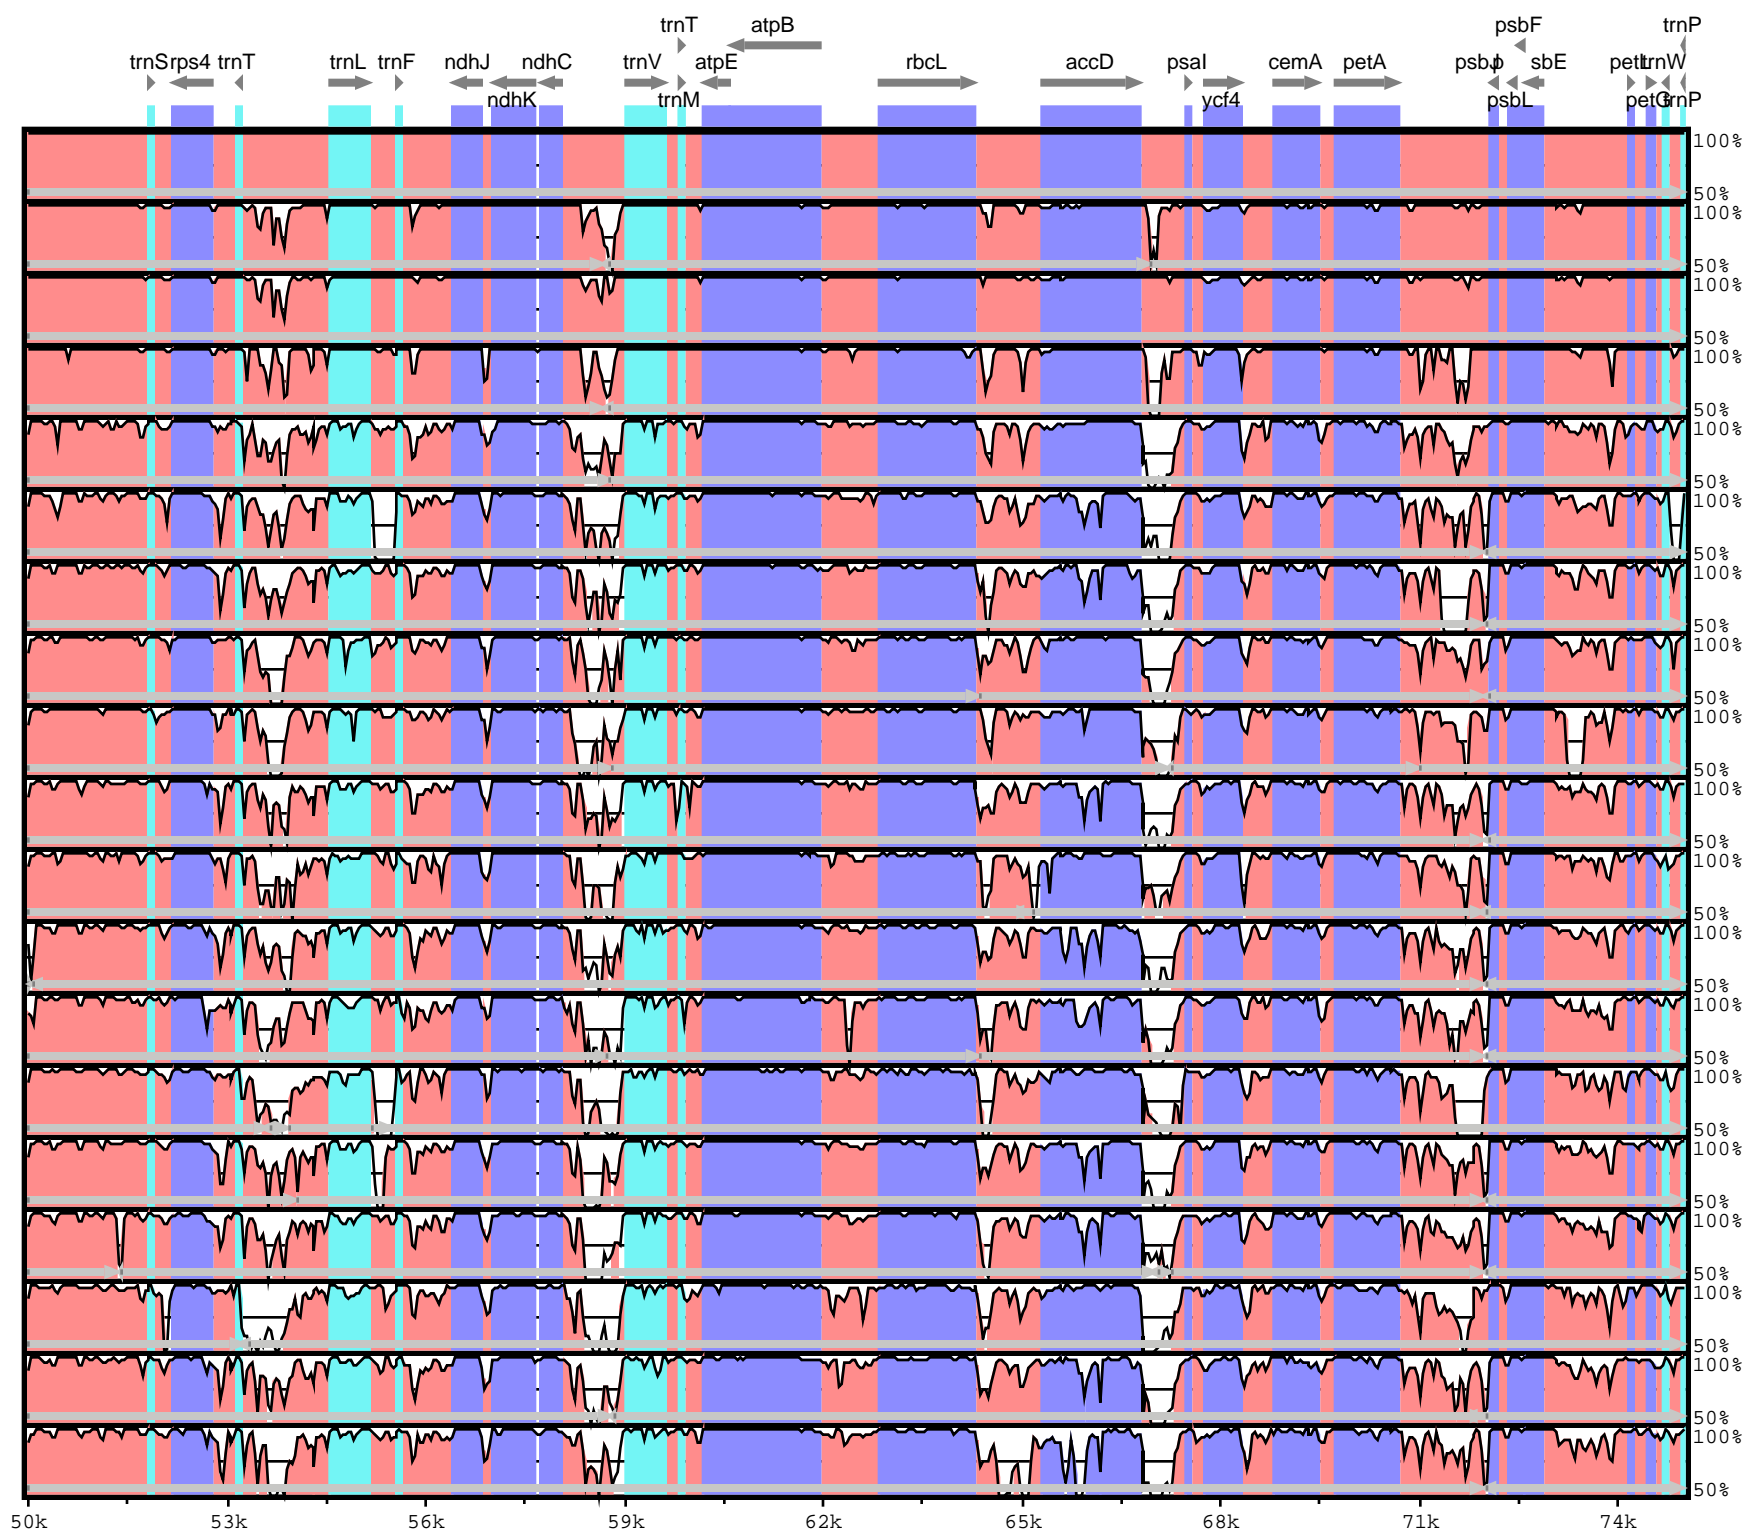

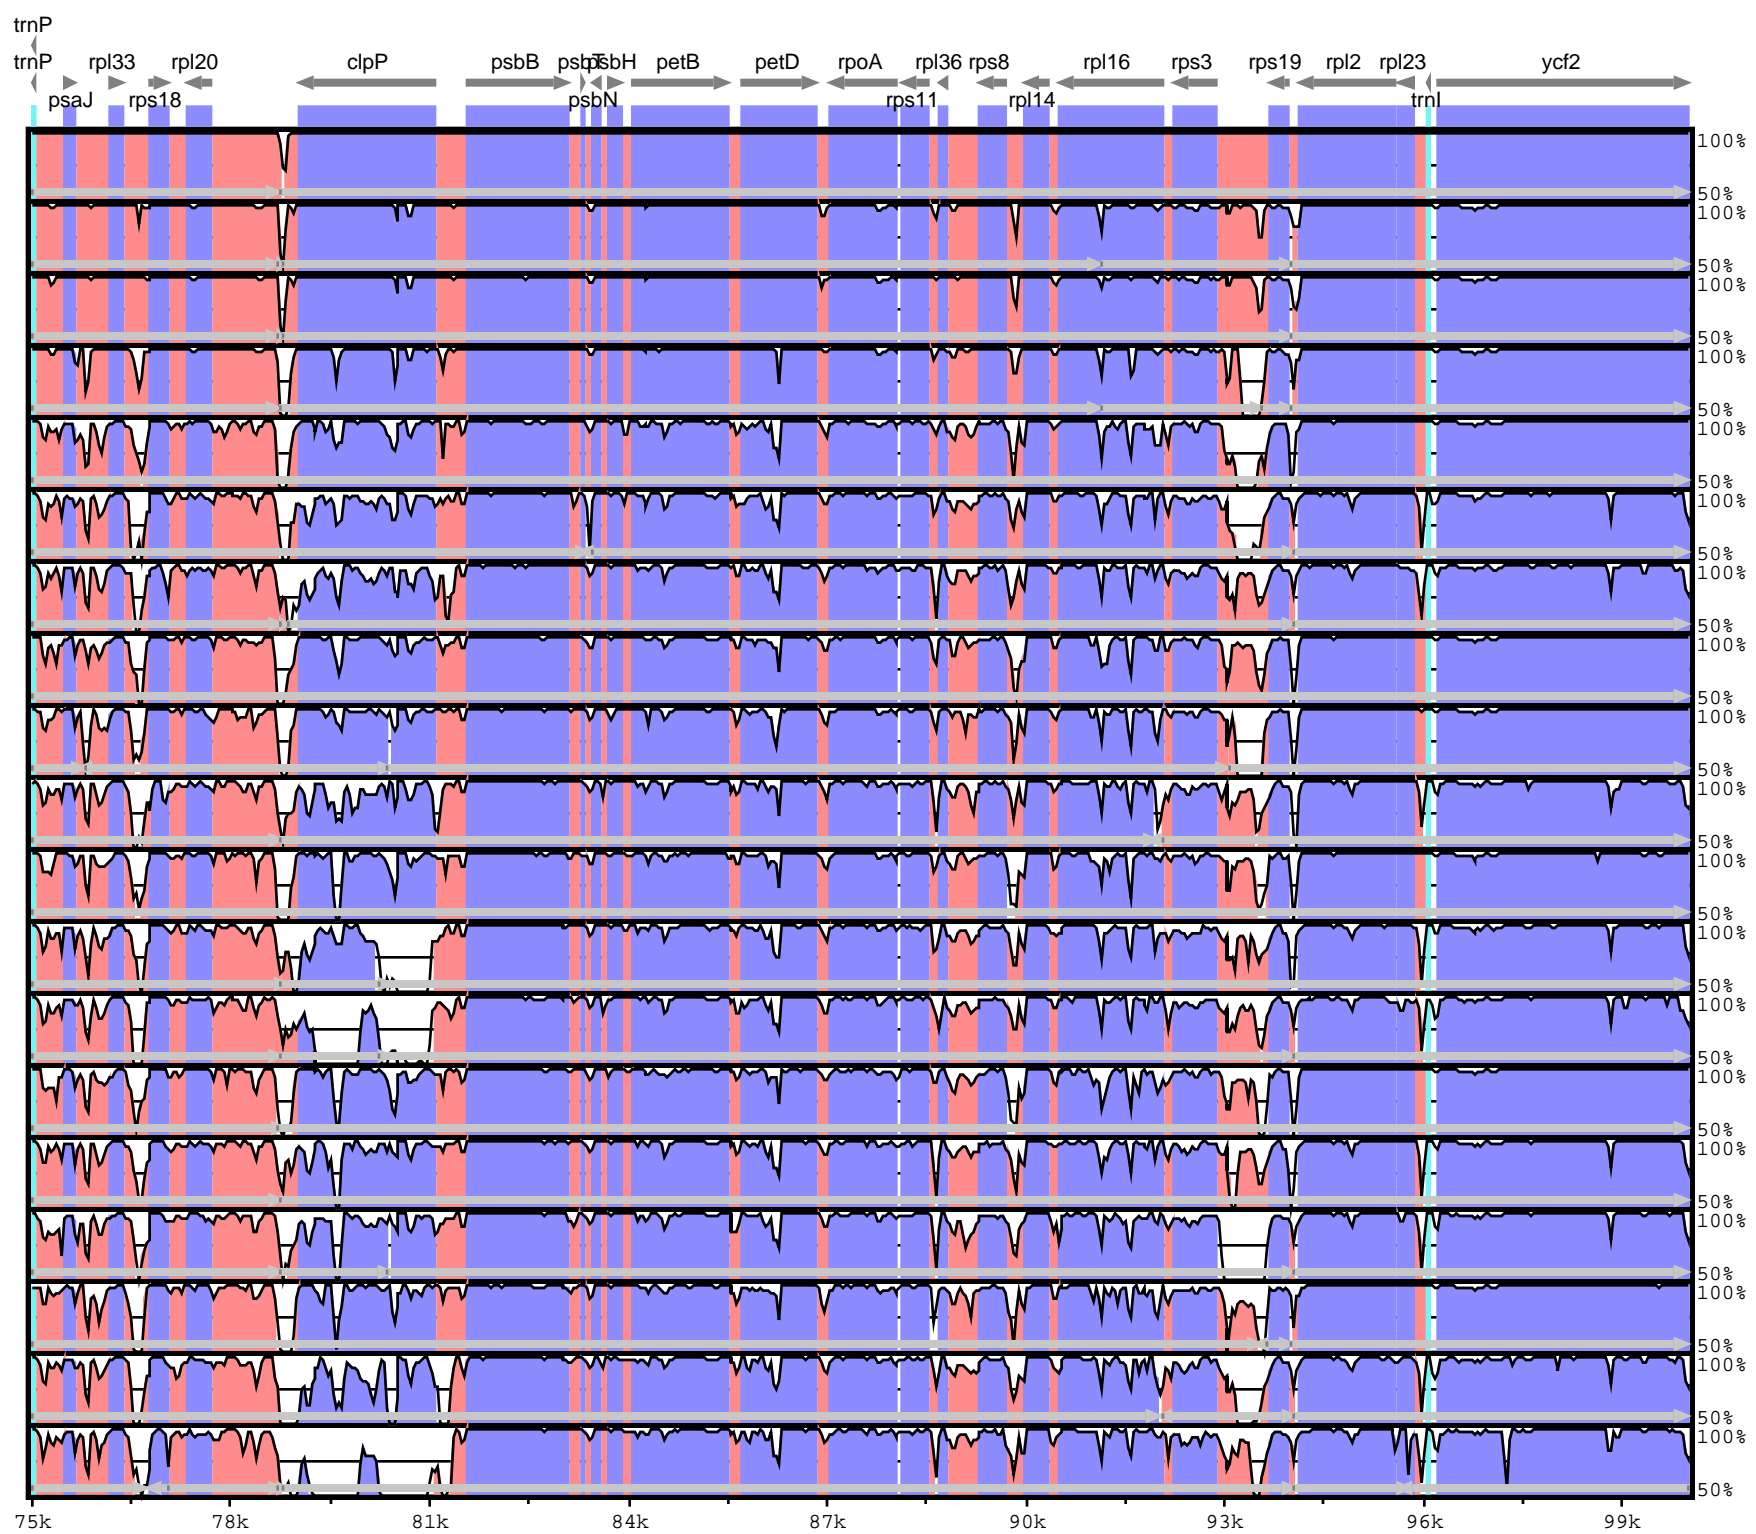

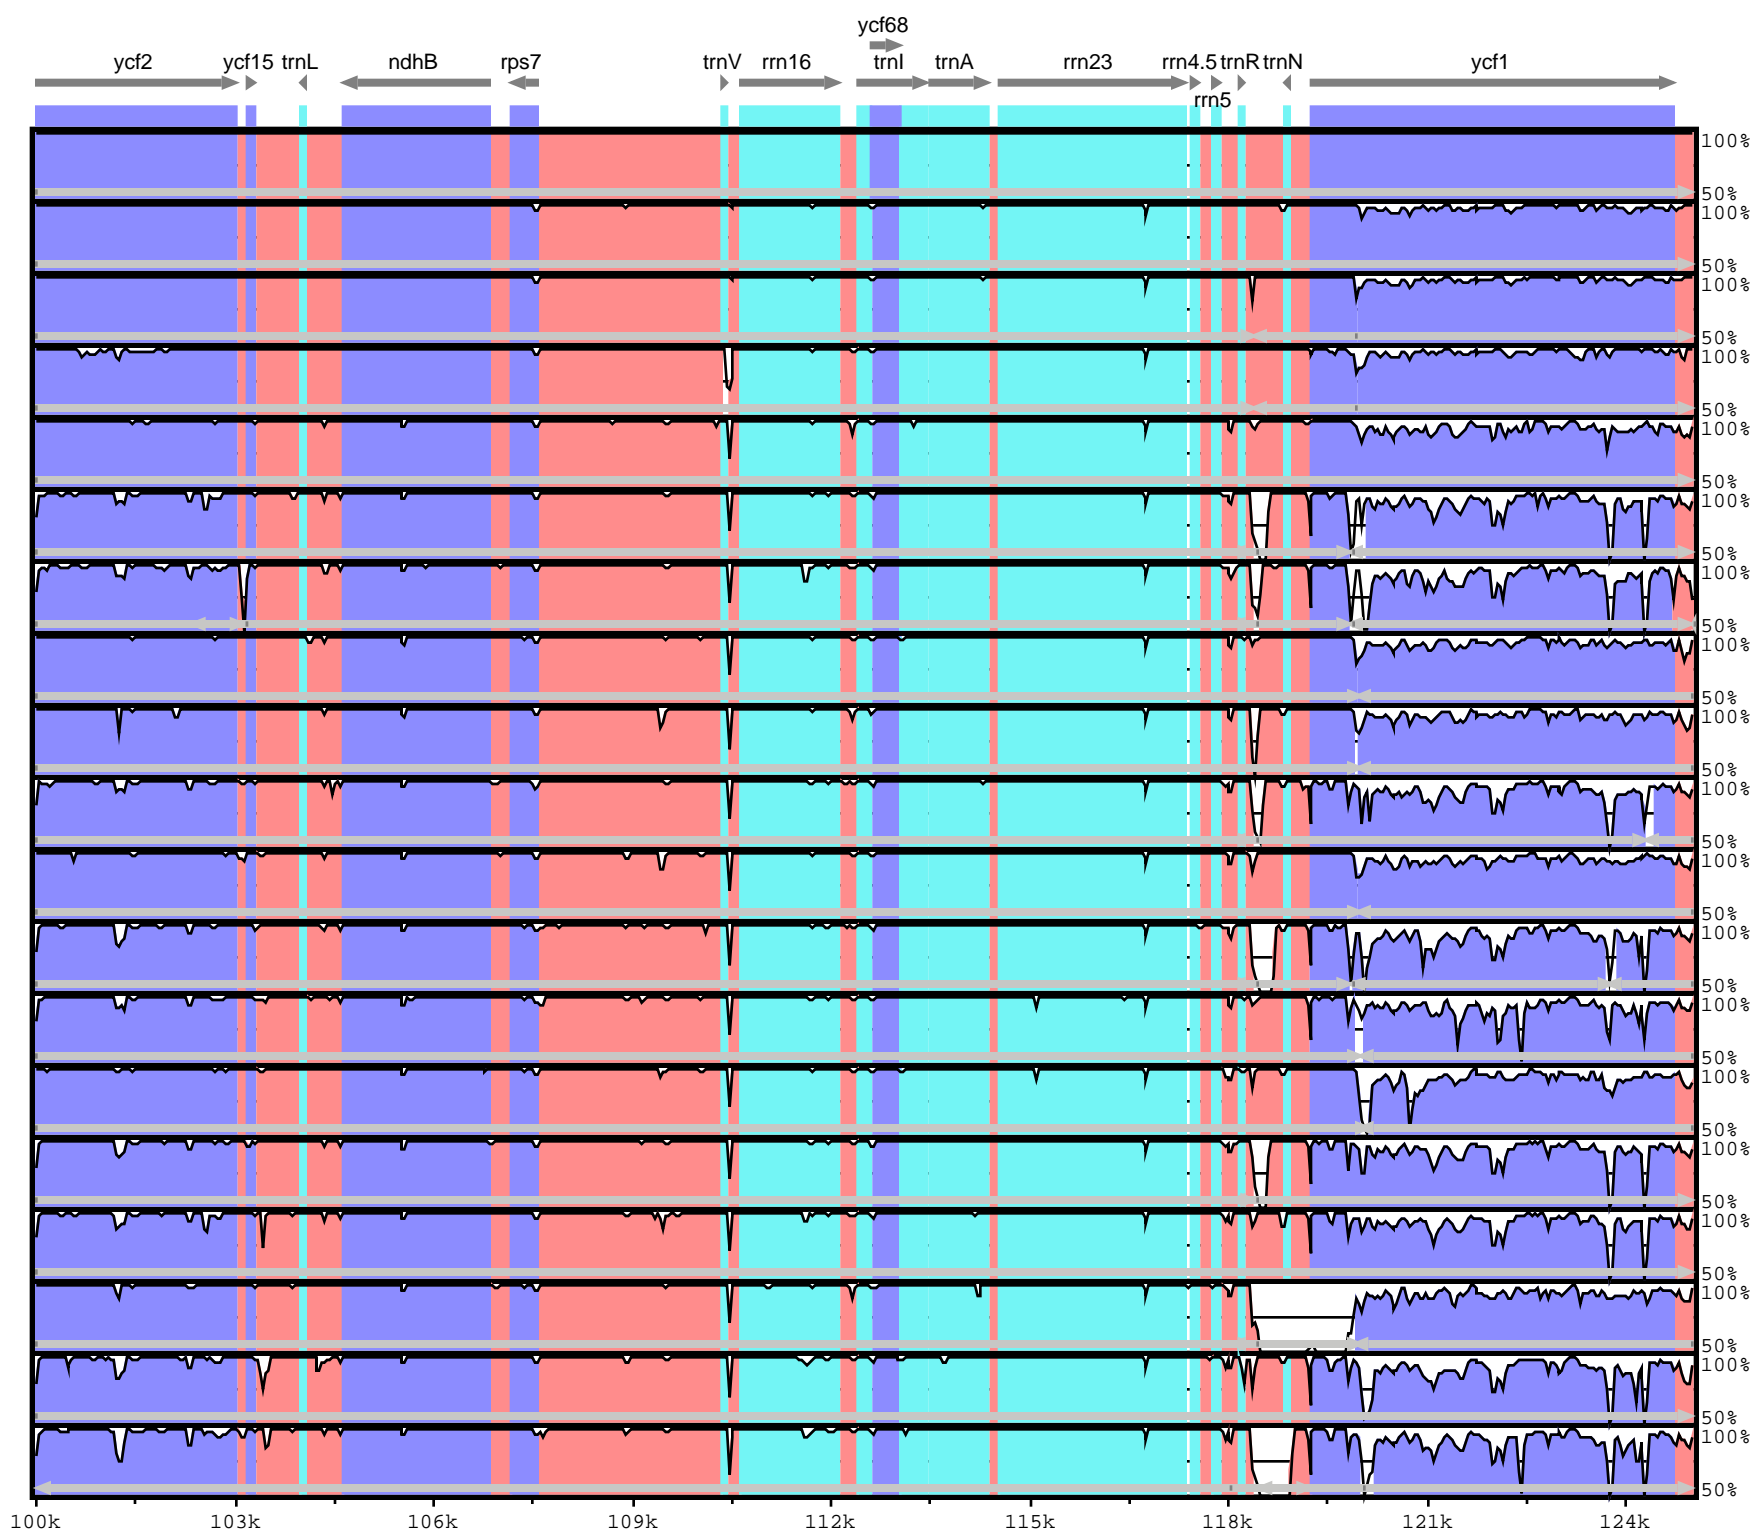

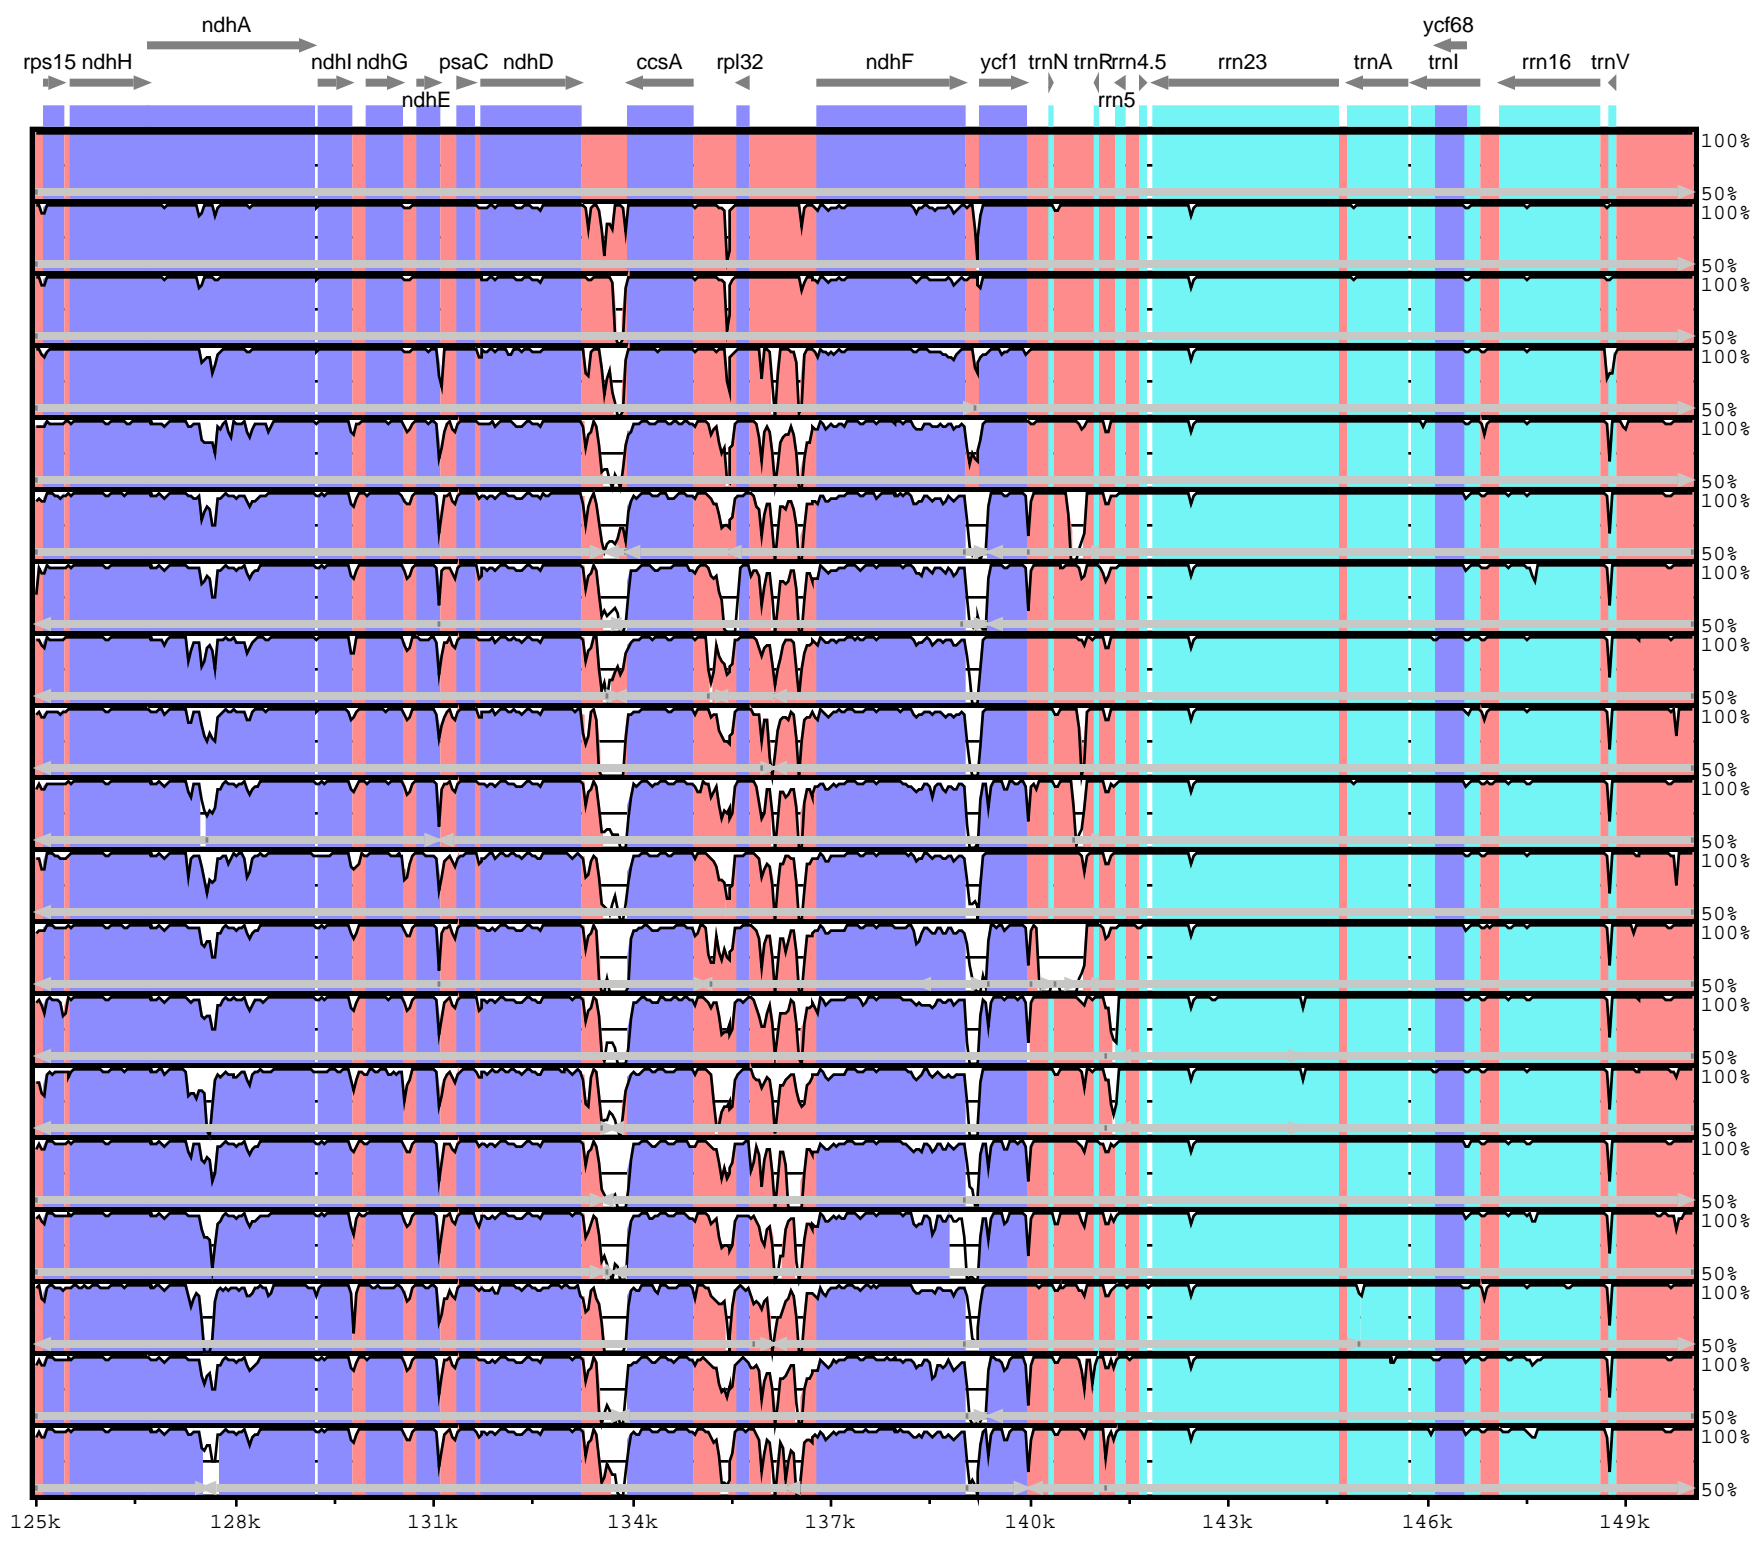

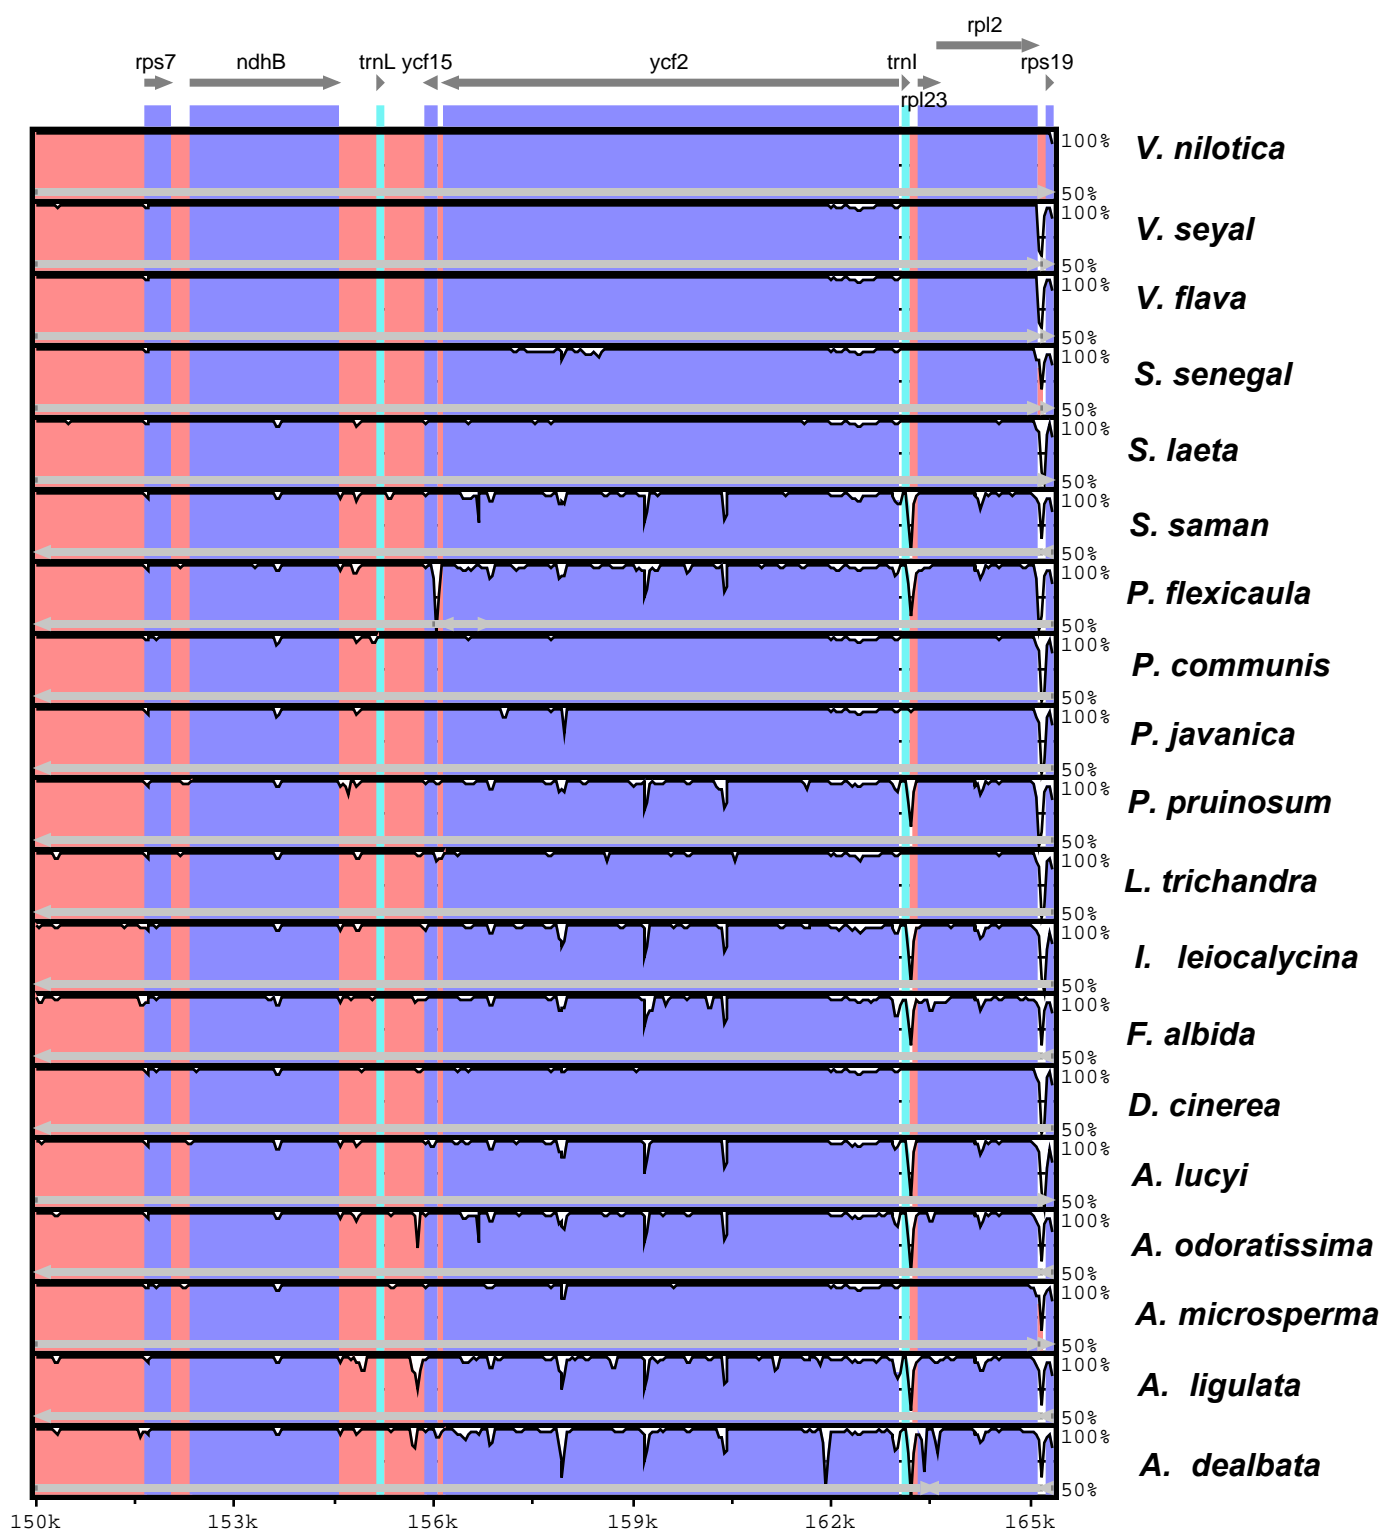

Supplement: pone.0225469.s001.pdf [file pone.0225469.s001.pdf]
